# Supplementary material
Source: PubMed Central journal article supplement (PMC4300760)
Supplement: JVI.03306-14_zjv999090012so1.pdf [file JVI.03306-14_zjv999090012so1.pdf]

**Fig. S1. Live cell movie of GFP-NS1 IAV protein moving through an intercellular connection.** MDCK cells in a live cell chamber mounted on a heated stage (37°C) with HEPES buffered DMEM were infected with recombinant influenza A virus expressing GFP-tagged NS1 (MOI = 1). The movie, taken at 36 h p.i., shows GFP-tagged viral NS1 protein moving through an intercellular connection and into the cytoplasm of a neighboring cell. The movie consists of 60 frames, 1 frame per 30 seconds, representing 30 minutes of real time. Images were photographed on a Zeiss LSM 5 confocal microscope.
